# Supplementary material for: Inflammation predicts new onset of depression in men, but not in women within a prospective, representative community cohort
Source: PubMed Central journal article supplement (PMC7838404; doi:10.1038/s41598-021-81927-9), 2021-01-26
Supplement: 41598_2021_81927_MOESM1_ESM.pdf [file 41598_2021_81927_MOESM1_ESM.pdf]

Supplement for “Inflammation predicts new onset of depression in men, but not in women within a prospective, representative community cohort”

Authors: Mareike Ernst, Elmar Brähler, Daniëlle Otten, Antonia M. Werner, Ana N. Tibubos, Iris Reiner, Felix Wicke, Jörg Wiltink, Matthias Michal, Markus Nagler, Thomas Münzel, Philipp S. Wild, Jochem König, Norbert Pfeiffer, Andreas Borta, Karl J. Lackner, Manfred E. Beutel

Supplementary Table 1. Baseline participant characteristics (stratified by PHQ-9≥10 at follow-up) by gender

| Variable                                   | Men                    |                           |                            |                 | Women                  |                           |                            |                 |
|--------------------------------------------|------------------------|---------------------------|----------------------------|-----------------|------------------------|---------------------------|----------------------------|-----------------|
|                                            | All<br>(N=5,450)       | PHQ-9≥10 at FU<br>(N=210) | PHQ-9≤9 at FU<br>(N=5,240) | <i>p</i>        | All<br>(N=4,670)       | PHQ-9≥10 at FU<br>(N=238) | PHQ-9≤9 at FU<br>(N=4,432) | <i>p</i>        |
| <i>Inflammation</i>                        |                        |                           |                            |                 |                        |                           |                            |                 |
| CRP ≥ 3 mg/l (%)                           | 21.6% (1,177)          | 29.0% (61)                | 21.3% (1,116)              | <b>.010</b>     | 26.6% (1,240)          | 27.0% (64)                | 26.6% (1,176)              | .88             |
| WBC                                        | 6.73 (5.69/8.01)       | 7.20 (6.08/8.97)          | 6.71 (5.68/7.99)           | <b>&lt;.001</b> | 6.90 (5.84/8.20)       | 7.09 (5.70/8.55)          | 6.90 (5.85/8.18)           | .42             |
| <i>Sociodemographic</i>                    |                        |                           |                            |                 |                        |                           |                            |                 |
| Age                                        | 54.6 (11.0)            | 52.5 (10.8)               | 54.7 (11.0)                | <b>.005</b>     | 54.0 (10.9)            | 50.1 (9.8)                | 54.2 (10.9)                | <b>&lt;.001</b> |
| Living with partner (%)                    | 87.0% (4,742)          | 81.0% (170)               | 87.3% (4,572)              | <b>.012</b>     | 81.5% (3,805)          | 78.6% (187)               | 81.7% (3,618)              | .23             |
| Socioeconomic status                       | 14.15 (4.48)           | 13.42 (4.42)              | 14.18 (4.48)               | <b>.017</b>     | 12.64 (4.13)           | 12.52 (4.09)              | 12.64 (4.13)               | .66             |
| <i>Physical health and health behavior</i> |                        |                           |                            |                 |                        |                           |                            |                 |
| Diabetes (%)                               | 9.2% (499)             | 12.9% (27)                | 9.0% (472)                 | .066            | 5.1% (240)             | 4.2% (10)                 | 5.2% (230)                 | .65             |
| CVD (%)                                    | 10.4% (561)            | 11.7% (24)                | 10.3% (537)                | .56             | 5.9% (275)             | 4.6% (11)                 | 6.0% (264)                 | .48             |
| Cancer (%)                                 | 7.2% (390)             | 6.2% (13)                 | 7.2% (377)                 | .68             | 8.8% (410)             | 11.3% (27)                | 8.6% (383)                 | .16             |
| Obesity (%)                                | 24.3% (1,325)          | 28.6% (60)                | 24.2% (1,266)              | .16             | 20.8% (973)            | 21.4% (51)                | 20.8% (973)                | .81             |
| Smoker (%)                                 | 18.0% (981)            | 27.5% (57)                | 17.6% (924)                | <b>&lt;.001</b> | 16.2% (757)            | 21.4% (51)                | 15.9% (706)                | <b>.030</b>     |
| Physical activity                          | 7,350.00<br>(5,031.67) | 7,665.00<br>(5,476.67)    | 7,320.00<br>(4,995.00)     | <b>.035</b>     | 7,499.96<br>(3,438.69) | 7,906.16<br>(3,845.06)    | 7,478.01<br>(3,414.59)     | .13             |

|                            |               |             |               |                 |               |             |               |                 |
|----------------------------|---------------|-------------|---------------|-----------------|---------------|-------------|---------------|-----------------|
| Alcohol (% > recom. limit) | 30.7% (1,669) | 29.0% (60)  | 30.7% (1,609) | .76             | 25.0% (1,167) | 17.2% (41)  | 25.4% (1,126) | <b>.007</b>     |
| Mental distress            |               |             |               |                 |               |             |               |                 |
| Loneliness (%)             | 5.6% (300)    | 17.4% (36)  | 5.1% (264)    | <b>&lt;.001</b> | 7.9% (366)    | 20.2% (47)  | 7.3% (319)    | <b>&lt;.001</b> |
| PHQ-9 sum at baseline      | 2.89 (2.27)   | 5.58 (2.40) | 2.79 (2.20)   | <b>&lt;.001</b> | 3.41 (2.31)   | 5.39 (2.34) | 3.31 (2.26)   | <b>&lt;.001</b> |

*Note.* Participant characteristics are shown as mean values and standard deviations, medians with interquartile ranges (if not fulfilling normal distribution) or as percentages and absolute numbers. Abbreviations: CRP=C-reactive protein; CVD=Cardiovascular disease; FU=follow-up; PHQ-9=Patient Health Questionnaire-9; WBC=White blood cell count.
